# Supplementary material
Source: MDPI journal article supplement (https://www.mdpi.com/2076-3417/14/3/1274)
Supplement: s1 [file s1]

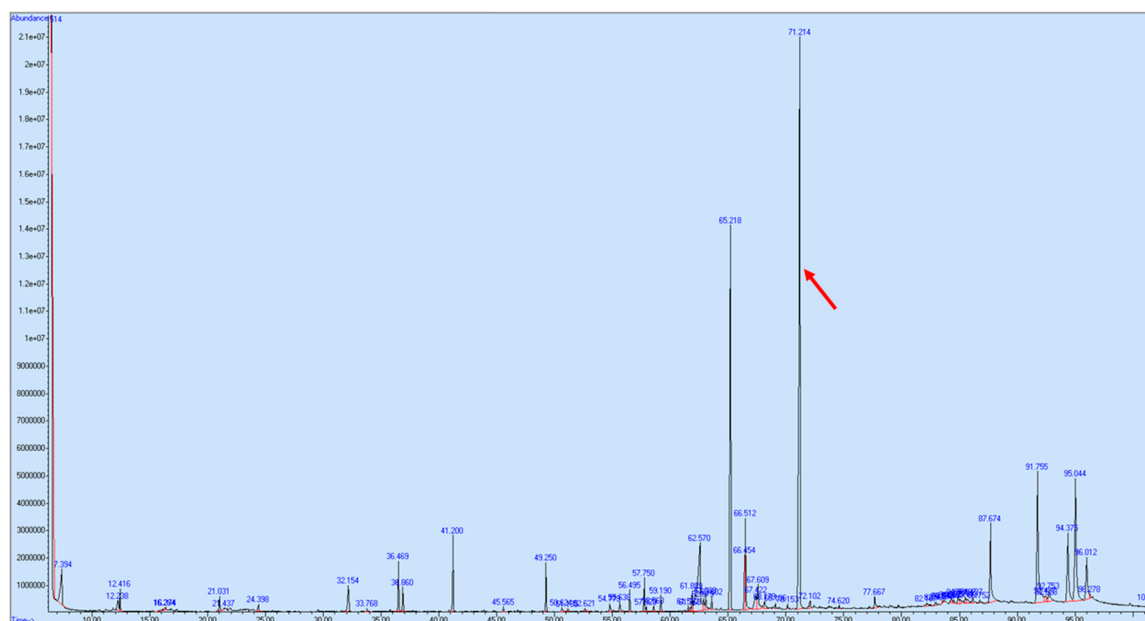

**Additional Figure S1:** GC-MS profile from the supercritical CO<sub>2</sub> extract without zoom. Total ion current obtained. Ceruchinol was detected at Tr=71.21minutes (red arrow) and corresponds to the majority peak.

| Score          | Expect                                                         | Method                       | Identities   | Positives    | Gaps      |
|----------------|----------------------------------------------------------------|------------------------------|--------------|--------------|-----------|
| 509 bits(1311) | 0.0                                                            | Compositional matrix adjust. | 260/353(74%) | 300/353(84%) | 5/353(1%) |
| Query 1        | MASREDE-LRNCVVCGDQATGYHFNALTCCEGCKGFFRRTVSKSIGPTCPFAGSCEVSKTQ  |                              |              |              | 59        |
| Sbjct 10       | MASEEEYGPRNCVVCGDRAATGYHFHALTCCEGCKGFFRRTVSKTIGPICPFAGRCEVSKAQ |                              |              |              | 69        |
| Query 60       | RRHCPACRLQKCLDAGMRKDMILSAEALALRRRAQAQRRRAQQTVPQLSKEQEELIRTLTG  |                              |              |              | 119       |
| Sbjct 70       | RRHCPACRLQKCL+ GMRKDMILSAEALALRRRAQAQRRRA++ +QL+++Q+EL++ LLG   |                              |              |              | 129       |
| Query 120      | AHTRHMGTMFEQFVQFRPPAHLFIHHQPLPTLAPVLPVTHFADINTFMVLQVIKFTKDL    |                              |              |              | 179       |
| Sbjct 130      | AHTRH+G MF+QFVQF+PPA+LF+HH+P PVLPL+THFADINTFMV Q+IKFTKDL       |                              |              |              | 189       |
| Query 180      | PVFRSLPIEDQISLLKGAAVEICHIVLNTTFCLQTQNFCLGPLYRTIEDGARVSPTVGFQ   |                              |              |              | 239       |
| Sbjct 190      | PLFRSLTMEDQISLLKGAAVEILHISLNTTFCLQTENFFCGPLCYKMEDAVH----AGFQ   |                              |              |              | 245       |
| Query 240      | VEFLELLFHFHGTLRKLQLOEPEYVLLAAMALFSPDRPGVTQRDEIDQLQEEMALTLSY    |                              |              |              | 299       |
| Sbjct 246      | EFLE + HFH L+ L LQOEPEYVL+AA ALFSPDRPGVTQR+EIDQLQEEMAL L ++    |                              |              |              | 305       |
| Query 300      | IKGQRRPRDRFLYAKLLGLLAELRSINEAYGYQIQHIQGLSAMPPLLQEICS           |                              |              |              | 352       |
| Sbjct 306      | IMEQQSRLQSRFLYAKLMGLLADLRSINNAYSVELQRLEELSAMTPLLGEICS          |                              |              |              | 358       |

**Additional Figure S2.** Alignments of the sequences of CAR proteins from human (query; Uniprot Q14994) and *M. musculus* (Sbjct; Uniprot O35627) species.
